# Supplementary material
Source: MDPI journal article supplement (https://www.mdpi.com/2071-1050/10/11/4103)
Supplement: s1 [file s1]

| City      | Province  | Degree of widening | City        | Province     | Degree of widening | City        | Province       | Degree of widening | City        | Province | Degree of widening | City      | Province | Degree of widening |
|-----------|-----------|--------------------|-------------|--------------|--------------------|-------------|----------------|--------------------|-------------|----------|--------------------|-----------|----------|--------------------|
| Bozhou    | Anhui     | 2.22               | Anshun      | Guizhou      | 2.50               | Huanggang   | Hubei          | 2.22               | Liaoyuan    | Jilin    | 3.75               | Jincheng  | Shanxi   | 6.67               |
| Mingguang | Anhui     | 4.17               | Duyun       | Guizhou      | 0.00               | Macheng     | Hubei          | 0.00               | Shulan      | Jilin    | 2.50               | Xiaoyi    | Shanxi   | 10.00              |
| Tongcheng | Anhui     | 1.50               | Qingzhen    | Guizhou      | 0.00               | Qianjiang   | Hubei          | 1.60               | Songyuan    | Jilin    | 0.00               | Chongzhou | Sichuan  | 0.00               |
| Tongling  | Anhui     | 4.00               | Danzhou     | Hainan       | 0.00               | Xiaogan     | Hubei          | 2.00               | Anshan      | Liaoning | 2.50               | Emeishan  | Sichuan  | 4.00               |
| Changle   | Fujian    | 1.93               | Dongfang    | Hainan       | 3.60               | Chenzhou    | Hunan          | 4.00               | Linghai     | Liaoning | 0.00               | Mianyang  | Sichuan  | 1.80               |
| Longhai   | Fujian    | 3.50               | Anguo       | Hebei        | 1.56               | Hengyang    | Hunan          | 0.00               | Tieling     | Liaoning | 3.00               | Panzhihua | Sichuan  | 6.00               |
| Nanping   | Fujian    | 0.00               | Langfang    | Hebei        | 4.00               | Leiyang     | Hunan          | 0.00               | Zhuanghe    | Liaoning | 4.57               | Pengzhou  | Sichuan  | 0.00               |
| Putian    | Fujian    | 2.00               | Qian'an     | Hebei        | 8.00               | Liling      | Hunan          | 0.00               | Qingtongxia | Ningxia  | 15.00              | Lhasa     | Tibet    | 7.00               |
| Dunhuang  | Gansu     | 6.00               | Xinji       | Hebei        | 0.00               | Genhe       | Inner Mongolia | 0.00               | Zhongwei    | Ningxia  | 3.20               | Aksu      | Xinjiang | 2.67               |
| Jinchang  | Gansu     | 1.60               | Zhangjiakou | Hebei        | 3.20               | Holingol    | Inner Mongolia | 11.00              | Xining      | Qinghai  | 1.67               | Hami      | Xinjiang | 0.00               |
| Linxia    | Gansu     | 4.00               | Bei'an      | Heilongjiang | 3.60               | Ordos       | Inner Mongolia | 14.00              | Hancheng    | Shaanxi  | 5.50               | Kuytun    | Xinjiang | 0.00               |
| Jiangmen  | Guangdong | 3.14               | Fujin       | Heilongjiang | 2.00               | Haimen      | Jiangsu        | 0.00               | Huayin      | Shaanxi  | 5.00               | Baoshan   | Yunnan   | 0.00               |
| Luoding   | Guangdong | 0.00               | Heihe       | Heilongjiang | 0.00               | Jiangyin    | Jiangsu        | 1.75               | Weinan      | Shaanxi  | 0.00               | Dali      | Yunnan   | 3.75               |
| Qingyuan  | Guangdong | 2.81               | Jiamusi     | Heilongjiang | 6.00               | Lianyungang | Jiangsu        | 3.89               | Dezhou      | Shandong | 3.75               | Jinghong  | Yunnan   | 1.56               |
| Shantou   | Guangdong | 0.00               | Ning'an     | Heilongjiang | 0.00               | Rugao       | Jiangsu        | 2.00               | Jining      | Shandong | 2.50               | Yuxi      | Yunnan   | 3.33               |
| Sihui     | Guangdong | 0.00               | Jiaozuo     | Henan        | 15.00              | Suzhou      | Jiangsu        | 1.88               | Pingdu      | Shandong | 15.00              | Huzhou    | Zhejiang | 0.00               |
| Xingning  | Guangdong | 3.00               | Luoyang     | Henan        | 3.08               | Ji'an       | Jiangxi        | 5.00               | Shouguang   | Shandong | 12.00              | Lanxi     | Zhejiang | 0.00               |
| Guilin    | Guangxi   | 10.00              | Mengzhou    | Henan        | 2.50               | Leping      | Jiangxi        | 0.00               | Tai'an      | Shandong | 3.50               | Wenling   | Zhejiang | 0.00               |
| Guiping   | Guangxi   | 0.00               | Xingyang    | Henan        | 3.00               | Xinyu       | Jiangxi        | 1.84               | Xintai      | Shandong | 2.50               | Zhoushan  | Zhejiang | 1.50               |
| Jingxi    | Guangxi   | 1.88               | Xinzheng    | Henan        | 2.50               | Zhangshu    | Jiangxi        | 0.00               | Changzhi    | Shanxi   | 7.86               | Zhuji     | Zhejiang | 1.50               |
| Wuzhou    | Guangxi   | 0.00               | Dangyang    | Hubei        | 0.00               | Hunchun     | Jilin          | 3.50               | Gujiao      | Shanxi   | 2.89               |           |          |                    |

Table S3. Degree of widening of the 104 cities
