# Supplementary material
Source: MDPI journal article supplement (https://www.mdpi.com/2071-1050/10/11/4103)
Supplement: s1 [file s1]

| City        | Province       | Engineering      |               |             |               | Waterfront Spaces |                 |             |                  | Ecological     |                 |                    |                    |                          |                      |
|-------------|----------------|------------------|---------------|-------------|---------------|-------------------|-----------------|-------------|------------------|----------------|-----------------|--------------------|--------------------|--------------------------|----------------------|
|             |                | Uniform widening | Multiple dams | New channel | Curve cut-off | Public spaces     | Linear greening | New ponding | Widen at a point | Adding islands | Curve revetment | New curved channel | Straight to curved | Concrete to naturalistic | Widen river corridor |
| Bozhou      | Anhui          | 2                | 0             | 0           | 0             | 4                 | 4               | 4           | 1                | 1              | 1               | 1                  | 0                  | 0                        | 0                    |
| Mingguang   | Anhui          | 1                | 0             | 1           | 1             | 1                 | 1               | 1           | 0                | 0              | 0               | 2                  | 0                  | 0                        | 0                    |
| Tongcheng   | Anhui          | 1                | 1             | 0           | 0             | 1                 | 1               | 1           | 0                | 0              | 0               | 0                  | 0                  | 0                        | 0                    |
| Tongling    | Anhui          | 1                | 1             | 0           | 0             | 4                 | 2               | 4           | 1                | 2              | 1               | 0                  | 0                  | 0                        | 0                    |
| Changle     | Fujian         | 1                | 0             | 0           | 1             | 3                 | 3               | 1           | 1                | 1              | 1               | 0                  | 0                  | 0                        | 0                    |
| Longhai     | Fujian         | 1                | 1             | 1           | 1             | 3                 | 2               | 0           | 0                | 0              | 0               | 0                  | 0                  | 0                        | 0                    |
| Nanping     | Fujian         | 0                | 0             | 0           | 0             | 1                 | 1               | 0           | 0                | 0              | 0               | 0                  | 0                  | 0                        | 0                    |
| Putian      | Fujian         | 2                | 1             | 1           | 1             | 2                 | 2               | 3           | 1                | 1              | 0               | 0                  | 0                  | 0                        | 0                    |
| Dunhuang    | Gansu          | 1                | 2             | 0           | 0             | 2                 | 2               | 2           | 0                | 0              | 0               | 0                  | 0                  | 0                        | 0                    |
| Jinchang    | Gansu          | 1                | 2             | 0           | 0             | 5                 | 3               | 4           | 1                | 1              | 0               | 1                  | 2                  | 0                        | 0                    |
| Linxia      | Gansu          | 2                | 3             | 0           | 1             | 3                 | 2               | 1           | 0                | 0              | 0               | 0                  | 0                  | 0                        | 0                    |
| Jiangmen    | Guangdong      | 2                | 1             | 1           | 0             | 3                 | 3               | 2           | 1                | 2              | 0               | 0                  | 0                  | 0                        | 0                    |
| Luoding     | Guangdong      | 0                | 0             | 0           | 0             | 2                 | 2               | 0           | 0                | 0              | 0               | 0                  | 0                  | 0                        | 0                    |
| Qingyuan    | Guangdong      | 1                | 2             | 2           | 1             | 2                 | 2               | 1           | 0                | 1              | 0               | 1                  | 0                  | 0                        | 0                    |
| Shantou     | Guangdong      | 0                | 2             | 1           | 0             | 6                 | 3               | 2           | 0                | 0              | 0               | 1                  | 0                  | 0                        | 0                    |
| Sihui       | Guangdong      | 0                | 0             | 0           | 1             | 1                 | 2               | 0           | 0                | 0              | 0               | 0                  | 0                  | 0                        | 0                    |
| Xingning    | Guangdong      | 1                | 1             | 0           | 1             | 1                 | 2               | 0           | 0                | 0              | 0               | 0                  | 0                  | 0                        | 0                    |
| Guilin      | Guangxi        | 2                | 3             | 0           | 0             | 4                 | 4               | 3           | 2                | 1              | 1               | 2                  | 0                  | 0                        | 0                    |
| Guiping     | Guangxi        | 0                | 0             | 0           | 0             | 0                 | 1               | 0           | 0                | 0              | 0               | 0                  | 0                  | 0                        | 0                    |
| Jingxi      | Guangxi        | 1                | 1             | 0           | 0             | 1                 | 2               | 1           | 0                | 0              | 0               | 0                  | 0                  | 0                        | 0                    |
| Wuzhou      | Guangxi        | 0                | 1             | 0           | 0             | 1                 | 1               | 1           | 0                | 0              | 0               | 0                  | 0                  | 0                        | 0                    |
| Anshun      | Guizhou        | 2                | 1             | 0           | 2             | 1                 | 2               | 0           | 0                | 0              | 0               | 0                  | 0                  | 0                        | 0                    |
| Duyun       | Guizhou        | 0                | 2             | 0           | 0             | 3                 | 3               | 0           | 2                | 2              | 0               | 0                  | 0                  | 0                        | 0                    |
| Qingzhen    | Guizhou        | 0                | 1             | 0           | 2             | 1                 | 1               | 0           | 0                | 0              | 0               | 0                  | 0                  | 0                        | 0                    |
| Danzhou     | Hainan         | 0                | 1             | 0           | 1             | 2                 | 1               | 0           | 0                | 0              | 0               | 0                  | 0                  | 0                        | 0                    |
| Dongfang    | Hainan         | 1                | 0             | 1           | 0             | 1                 | 1               | 1           | 0                | 0              | 0               | 0                  | 0                  | 0                        | 0                    |
| Anguo       | Hebei          | 2                | 2             | 0           | 0             | 1                 | 1               | 2           | 0                | 0              | 0               | 0                  | 0                  | 0                        | 0                    |
| Langfang    | Hebei          | 1                | 2             | 0           | 0             | 1                 | 1               | 2           | 1                | 0              | 0               | 1                  | 1                  | 1                        | 0                    |
| Qian'an     | Hebei          | 3                | 3             | 0           | 1             | 4                 | 3               | 0           | 2                | 2              | 1               | 1                  | 1                  | 1                        | 0                    |
| Xinji       | Hebei          | 0                | 0             | 0           | 0             | 0                 | 0               | 2           | 0                | 0              | 0               | 0                  | 0                  | 0                        | 0                    |
| Zhangjiakou | Hebei          | 3                | 2             | 0           | 0             | 3                 | 3               | 0           | 0                | 0              | 0               | 0                  | 0                  | 0                        | 0                    |
| Bei'an      | Heilongjiang   | 2                | 2             | 0           | 1             | 1                 | 2               | 1           | 0                | 0              | 0               | 0                  | 0                  | 0                        | 0                    |
| Fujin       | Heilongjiang   | 1                | 1             | 0           | 0             | 1                 | 1               | 0           | 0                | 0              | 0               | 0                  | 0                  | 0                        | 0                    |
| Heihe       | Heilongjiang   | 0                | 1             | 0           | 2             | 2                 | 1               | 1           | 0                | 0              | 0               | 0                  | 0                  | 0                        | 0                    |
| Jiamusi     | Heilongjiang   | 2                | 1             | 0           | 0             | 2                 | 3               | 1           | 0                | 0              | 0               | 0                  | 0                  | 0                        | 0                    |
| Ning'an     | Heilongjiang   | 0                | 0             | 0           | 0             | 1                 | 1               | 0           | 0                | 0              | 0               | 0                  | 0                  | 0                        | 0                    |
| Jiaozuo     | Henan          | 2                | 3             | 1           | 0             | 4                 | 4               | 3           | 0                | 0              | 1               | 1                  | 0                  | 0                        | 0                    |
| Luoyang     | Henan          | 5                | 5             | 1           | 0             | 7                 | 5               | 3           | 1                | 4              | 3               | 1                  | 1                  | 0                        | 1                    |
| Mengzhou    | Henan          | 1                | 1             | 0           | 0             | 1                 | 1               | 0           | 1                | 1              | 0               | 0                  | 0                  | 0                        | 0                    |
| Xingyang    | Henan          | 2                | 2             | 0           | 0             | 2                 | 2               | 2           | 2                | 0              | 0               | 0                  | 0                  | 0                        | 0                    |
| Xinzheng    | Henan          | 2                | 2             | 0           | 0             | 4                 | 3               | 0           | 2                | 2              | 0               | 0                  | 0                  | 0                        | 0                    |
| Dangyang    | Hubei          | 0                | 1             | 0           | 0             | 2                 | 2               | 0           | 0                | 0              | 0               | 0                  | 0                  | 0                        | 0                    |
| Huanggang   | Hubei          | 1                | 0             | 0           | 1             | 0                 | 1               | 0           | 0                | 0              | 0               | 0                  | 0                  | 0                        | 0                    |
| Macheng     | Hubei          | 0                | 2             | 0           | 0             | 1                 | 1               | 0           | 0                | 0              | 0               | 0                  | 0                  | 0                        | 0                    |
| Qianjiang   | Hubei          | 1                | 0             | 0           | 0             | 1                 | 1               | 1           | 0                | 0              | 0               | 0                  | 0                  | 0                        | 0                    |
| Xiaogan     | Hubei          | 2                | 1             | 1           | 0             | 3                 | 2               | 1           | 2                | 2              | 1               | 0                  | 1                  | 0                        | 0                    |
| Chenzhou    | Hunan          | 4                | 2             | 1           | 1             | 4                 | 5               | 1           | 4                | 2              | 0               | 0                  | 0                  | 0                        | 0                    |
| Hengyang    | Hunan          | 0                | 0             | 0           | 0             | 4                 | 3               | 1           | 0                | 0              | 0               | 1                  | 0                  | 0                        | 0                    |
| Leiyang     | Hunan          | 0                | 0             | 0           | 0             | 0                 | 1               | 0           | 0                | 0              | 0               | 0                  | 0                  | 0                        | 0                    |
| Liling      | Hunan          | 0                | 0             | 0           | 0             | 2                 | 1               | 0           | 0                | 0              | 0               | 0                  | 0                  | 0                        | 0                    |
| Genhe       | Inner Mongolia | 0                | 0             | 0           | 0             | 0                 | 1               | 0           | 0                | 0              | 0               | 0                  | 0                  | 0                        | 0                    |
| Holingol    | Inner Mongolia | 2                | 3             | 1           | 0             | 3                 | 3               | 1           | 2                | 2              | 1               | 1                  | 0                  | 0                        | 0                    |
| Ordos       | Inner Mongolia | 6                | 7             | 1           | 0             | 6                 | 4               | 3           | 4                | 0              | 0               | 1                  | 0                  | 0                        | 0                    |
| Haimen      | Jiangsu        | 0                | 0             | 0           | 0             | 5                 | 3               | 2           | 0                | 0              | 1               | 1                  | 1                  | 0                        | 0                    |
| Jiangyin    | Jiangsu        | 1                | 2             | 2           | 0             | 3                 | 2               | 4           | 1                | 2              | 1               | 0                  | 0                  | 0                        | 0                    |
| Lianyungang | Jiangsu        | 2                | 2             | 2           | 0             | 4                 | 4               | 2           | 0                | 1              | 1               | 0                  | 0                  | 0                        | 0                    |
| Rugao       | Jiangsu        | 1                | 1             | 0           | 0             | 3                 | 3               | 2           | 2                | 1              | 1               | 0                  | 0                  | 0                        | 0                    |
| Suzhou      | Jiangsu        | 2                | 3             | 4           | 0             | 9                 | 8               | 4           | 5                | 3              | 2               | 0                  | 1                  | 0                        | 0                    |
| Ji'an       | Jiangxi        | 1                | 0             | 1           | 0             | 2                 | 2               | 3           | 1                | 2              | 0               | 1                  | 0                  | 0                        | 0                    |
| Leping      | Jiangxi        | 0                | 0             | 0           | 0             | 1                 | 0               | 1           | 0                | 0              | 0               | 0                  | 0                  | 0                        | 0                    |
| Xinyu       | Jiangxi        | 2                | 1             | 0           | 1             | 3                 | 4               | 1           | 1                | 1              | 0               | 0                  | 0                  | 0                        | 0                    |
| Zhangshu    | Jiangxi        | 0                | 0             | 1           | 1             | 1                 | 1               | 0           | 1                | 0              | 0               | 0                  | 0                  | 0                        | 0                    |
| Hunchun     | Jilin          | 1                | 2             | 0           | 1             | 5                 | 2               | 0           | 2                | 1              | 0               | 0                  | 0                  | 0                        | 0                    |
| Liaoyuan    | Jilin          | 2                | 1             | 0           | 2             | 1                 | 2               | 0           | 0                | 0              | 0               | 0                  | 0                  | 0                        | 0                    |
| Shulan      | Jilin          | 2                | 1             | 0           | 0             | 1                 | 1               | 1           | 0                | 0              | 0               | 0                  | 0                  | 0                        | 0                    |
| Songyuan    | Jilin          | 0                | 2             | 0           | 0             | 2                 | 3               | 2           | 0                | 0              | 0               | 1                  | 0                  | 0                        | 0                    |
| Anshan      | Liaoning       | 2                | 4             | 0           | 0             | 5                 | 4               | 0           | 2                | 0              | 1               | 0                  | 0                  | 0                        | 0                    |
| Linghai     | Liaoning       | 0                | 2             | 0           | 0             | 1                 | 1               | 0           | 1                | 0              | 0               | 0                  | 0                  | 0                        | 0                    |

|             |          |   |   |   |   |   |   |   |   |   |   |   |   |   |   |
|-------------|----------|---|---|---|---|---|---|---|---|---|---|---|---|---|---|
| Tieling     | Liaoning | 2 | 3 | 1 | 0 | 2 | 2 | 2 | 0 | 1 | 1 | 0 | 0 | 0 | 0 |
| Zhuanghe    | Liaoning | 4 | 0 | 0 | 2 | 3 | 3 | 1 | 0 | 1 | 1 | 0 | 0 | 0 | 0 |
| Qingtongxia | Ningxia  | 1 | 1 | 0 | 0 | 3 | 3 | 2 | 0 | 0 | 0 | 0 | 0 | 0 | 0 |
| Zhongwei    | Ningxia  | 1 | 1 | 0 | 0 | 4 | 1 | 5 | 0 | 1 | 0 | 0 | 0 | 0 | 0 |
| Xining      | Qinghai  | 4 | 2 | 2 | 2 | 4 | 2 | 2 | 2 | 2 | 1 | 0 | 0 | 0 | 0 |
| Hancheng    | Shaanxi  | 1 | 3 | 0 | 0 | 1 | 1 | 2 | 0 | 0 | 0 | 0 | 0 | 0 | 0 |
| Huayin      | Shaanxi  | 1 | 1 | 0 | 0 | 2 | 2 | 1 | 0 | 0 | 1 | 0 | 1 | 0 | 0 |
| Weinan      | Shaanxi  | 0 | 1 | 1 | 0 | 4 | 2 | 1 | 0 | 0 | 0 | 0 | 0 | 0 | 0 |
| Dezhou      | Shandong | 3 | 2 | 0 | 0 | 2 | 3 | 2 | 2 | 1 | 0 | 0 | 0 | 0 | 0 |
| Jining      | Shandong | 2 | 2 | 4 | 0 | 5 | 6 | 3 | 1 | 0 | 3 | 0 | 0 | 0 | 0 |
| Pingdu      | Shandong | 3 | 3 | 0 | 0 | 2 | 2 | 0 | 0 | 0 | 2 | 0 | 0 | 0 | 0 |
| Shouguang   | Shandong | 2 | 1 | 0 | 0 | 3 | 2 | 4 | 0 | 1 | 1 | 0 | 0 | 0 | 0 |
| Tai'an      | Shandong | 4 | 5 | 0 | 2 | 4 | 5 | 4 | 1 | 2 | 0 | 0 | 0 | 0 | 0 |
| Xintai      | Shandong | 1 | 2 | 0 | 0 | 3 | 3 | 1 | 2 | 0 | 1 | 0 | 0 | 0 | 0 |
| Changzhi    | Shanxi   | 2 | 4 | 1 | 0 | 4 | 5 | 2 | 2 | 3 | 0 | 0 | 0 | 0 | 0 |
| Gujiao      | Shanxi   | 1 | 1 | 0 | 0 | 1 | 2 | 0 | 0 | 0 | 0 | 0 | 0 | 0 | 0 |
| Jincheng    | Shanxi   | 2 | 2 | 0 | 1 | 2 | 3 | 4 | 2 | 2 | 2 | 0 | 0 | 0 | 0 |
| Xiaoyi      | Shanxi   | 2 | 3 | 0 | 0 | 2 | 2 | 2 | 1 | 1 | 0 | 0 | 0 | 0 | 0 |
| Chongzhou   | Sichuan  | 0 | 1 | 0 | 0 | 1 | 1 | 1 | 0 | 0 | 0 | 0 | 0 | 0 | 0 |
| Emeishan    | Sichuan  | 1 | 1 | 1 | 0 | 2 | 2 | 0 | 2 | 1 | 0 | 0 | 0 | 0 | 0 |
| Mianyang    | Sichuan  | 1 | 2 | 0 | 0 | 4 | 5 | 2 | 1 | 0 | 0 | 0 | 0 | 0 | 0 |
| Panzhihua   | Sichuan  | 2 | 1 | 0 | 1 | 3 | 3 | 1 | 0 | 0 | 0 | 0 | 0 | 0 | 0 |
| Pengzhou    | Sichuan  | 0 | 0 | 0 | 0 | 0 | 1 | 0 | 0 | 0 | 0 | 0 | 0 | 0 | 0 |
| Lhasa       | Tibet    | 3 | 3 | 0 | 1 | 5 | 4 | 5 | 2 | 0 | 0 | 0 | 0 | 0 | 0 |
| Aksu        | Xinjiang | 2 | 1 | 1 | 0 | 3 | 2 | 1 | 2 | 2 | 2 | 0 | 2 | 1 | 0 |
| Hami        | Xinjiang | 0 | 0 | 0 | 0 | 3 | 2 | 1 | 2 | 0 | 0 | 0 | 0 | 0 | 0 |
| Kuytun      | Xinjiang | 0 | 0 | 0 | 0 | 0 | 0 | 5 | 0 | 0 | 0 | 0 | 0 | 0 | 0 |
| Baoshan     | Yunnan   | 0 | 0 | 0 | 0 | 1 | 1 | 3 | 0 | 0 | 0 | 0 | 0 | 0 | 0 |
| Dali        | Yunnan   | 1 | 1 | 0 | 0 | 2 | 2 | 0 | 0 | 0 | 0 | 0 | 0 | 0 | 0 |
| Jinghong    | Yunnan   | 1 | 0 | 0 | 1 | 2 | 2 | 2 | 0 | 0 | 0 | 1 | 0 | 0 | 0 |
| Yuxi        | Yunnan   | 2 | 2 | 0 | 0 | 3 | 3 | 4 | 2 | 1 | 2 | 0 | 0 | 0 | 0 |
| Huzhou      | Zhejiang | 0 | 0 | 2 | 0 | 8 | 7 | 5 | 1 | 1 | 1 | 0 | 0 | 0 | 0 |
| Lanxi       | Zhejiang | 0 | 0 | 0 | 0 | 2 | 1 | 0 | 0 | 0 | 0 | 0 | 0 | 0 | 0 |
| Wenling     | Zhejiang | 0 | 0 | 0 | 0 | 1 | 3 | 1 | 0 | 0 | 0 | 0 | 0 | 0 | 0 |
| Zhoushan    | Zhejiang | 1 | 0 | 4 | 1 | 5 | 3 | 3 | 0 | 0 | 1 | 1 | 0 | 0 | 0 |
| Zhuji       | Zhejiang | 1 | 1 | 0 | 0 | 6 | 4 | 1 | 0 | 0 | 0 | 0 | 1 | 0 | 0 |

Table S2. The years with river projects visible of the 104 cities.
