# Supplementary material
Source: MDPI journal article supplement (https://www.mdpi.com/2071-1050/10/11/4103)
Supplement: s1 [file s1]

| City        | Province       | Topography |       |        |        | Social-economic |                 |                 |                 |                     |                 | River related |      | City designation |
|-------------|----------------|------------|-------|--------|--------|-----------------|-----------------|-----------------|-----------------|---------------------|-----------------|---------------|------|------------------|
|             |                | EL         | S     | R      | TR     | UDP             | UDA             | ABD             | AGS             | GDP                 | GDP per capital | NR            | MRW  | LGC              |
|             |                | m          | °     | m      | -      | 10 <sup>4</sup> | km <sup>2</sup> | km <sup>2</sup> | km <sup>2</sup> | 10 <sup>4</sup> RMB | RMB             | -             | m    | -                |
| Bozhou      | Anhui          | 39.47      | 5.89  | 36.74  | 1.0078 | 32.09           | 86.90           | 56.00           | 4.61            | 3318489             | 20136.5         | 7             | 500  | 2                |
| Mingguang   | Anhui          | 17.18      | 5.15  | 30.20  | 1.0055 | 15.98           | 40.00           | 24.95           | 2.20            | 1202101             | 18324.7         | 3             | 120  | 2                |
| Tongcheng   | Anhui          | 60.36      | 8.28  | 63.37  | 1.0156 | 16.77           | 91.56           | 26.60           | 2.05            | 2271328             | 29925.3         | 2             | 160  | 2                |
| Tongling    | Anhui          | 29.95      | 7.57  | 58.20  | 1.0148 | 47.53           | 180.60          | 75.88           | 7.65            | 7169364             | 135783.4        | 3             | 3600 | 3                |
| Changle     | Fujian         | 37.85      | 9.66  | 102.06 | 1.0273 | 22.05           | 176.37          | 22.00           | 0.67            | 5703646             | 79217.3         | 5             | 120  | 2                |
| Longhai     | Fujian         | 13.71      | 3.96  | 33.76  | 1.0065 | 19.89           | 27.00           | 21.08           | 5.09            | 6403575             | 72933.7         | 5             | 600  | 2                |
| Nanping     | Fujian         | 173.77     | 18.74 | 176.35 | 1.0758 | 35.30           | 199.51          | 41.24           | 5.64            | 4294087             | 46123.4         | 2             | 600  | 2                |
| Putian      | Fujian         | 53.20      | 6.26  | 63.18  | 1.0136 | 62.70           | 244.00          | 86.90           | 1.17            | 13454194            | 51254.1         | 22            | 80   | 3                |
| Dunhuang    | Gansu          | 1147.41    | 5.82  | 33.53  | 1.0075 | 11.58           | 19.86           | 15.01           | 6.16            | 1021740             | 45817.9         | 1             | 25   | 3                |
| Jinchang    | Gansu          | 1527.90    | 6.64  | 39.15  | 1.0095 | 19.36           | 52.30           | 42.17           | 5.01            | 1607042             | 64025.6         | 2             | 5    | 3                |
| Linxia      | Gansu          | 1911.28    | 8.26  | 58.29  | 1.0168 | 22.93           | 33.46           | 23.00           | 0.52            | 614250              | 15318.0         | 3             | 100  | 1                |
| Jiangmen    | Guangdong      | 25.37      | 7.23  | 54.99  | 1.0154 | 115.01          | 566.00          | 150.00          | 3.45            | 12138715            | 72949.0         | 7             | 1800 | 3                |
| Luoding     | Guangdong      | 56.16      | 7.33  | 48.74  | 1.0125 | 33.21           | 70.00           | 23.80           | 2.56            | 1777821             | 13665.0         | 1             | 120  | 0                |
| Qingyuan    | Guangdong      | 15.11      | 5.89  | 38.07  | 1.0083 | 60.35           | 311.03          | 63.22           | 7.97            | 6876542             | 39840.9         | 5             | 1200 | 3                |
| Shantou     | Guangdong      | 15.73      | 4.98  | 37.05  | 1.0081 | 253.37          | 607.88          | 253.60          | 10.66           | 18522561            | 32835.6         | 7             | 3500 | 3                |
| Sihui       | Guangdong      | 14.96      | 4.96  | 29.24  | 1.0054 | 22.50           | 50.00           | 25.67           | 3.51            | 5438884             | 107914.4        | 2             | 600  | 0                |
| Xingning    | Guangdong      | 102.51     | 8.57  | 55.66  | 1.0163 | 25.72           | 121.00          | 27.95           | 0.60            | 1527578             | 12869.2         | 3             | 88   | 1                |
| Guilin      | Guangxi        | 189.02     | 12.73 | 118.71 | 1.0519 | 94.01           | 612.63          | 98.51           | 15.36           | 7826658             | 57296.2         | 5             | 400  | 3                |
| Guiping     | Guangxi        | 56.75      | 9.93  | 90.62  | 1.0271 | 19.82           | 73.50           | 35.50           | 3.43            | 2954931             | 14774.7         | 2             | 650  | 0                |
| Jingxi      | Guangxi        | 755.17     | 9.84  | 100.06 | 1.0329 | 16.05           | 35.78           | 16.80           | 0.79            | 1274459             | 19136.0         | 3             | 80   | 2                |
| Wuzhou      | Guangxi        | 59.78      | 12.66 | 106.31 | 1.0417 | 60.79           | 485.01          | 55.96           | 3.01            | 5398235             | 58485.8         | 2             | 1300 | 3                |
| Anshun      | Guizhou        | 1389.82    | 13.92 | 107.33 | 1.0484 | 46.44           | 145.88          | 66.30           | 7.86            | 3504413             | 27879.2         | 2             | 25   | 3                |
| Duyun       | Guizhou        | 860.10     | 16.19 | 157.24 | 1.0612 | 23.80           | 300.00          | 32.00           | 1.10            | 1716712             | 33013.7         | 1             | 150  | 2                |
| Qingzhen    | Guizhou        | 1244.58    | 10.39 | 83.78  | 1.0239 | 17.21           | 51.60           | 19.00           | 0.13            | 2533349             | 43528.3         | 2             | 100  | 1                |
| Danzhou     | Hainan         | 143.64     | 7.27  | 50.87  | 1.0111 | 21.60           | 194.05          | 31.88           | 5.12            | 2317313             | 23743.0         | 2             | 30   | 3                |
| Dongfang    | Hainan         | 13.01      | 3.53  | 22.29  | 1.0028 | 13.28           | 37.08           | 18.83           | 0.43            | 1442700             | 28343.8         | 2             | 50   | 0                |
| Anguo       | Hebei          | 30.56      | 4.14  | 20.95  | 1.0036 | 10.35           | 81.00           | 13.12           | 0.42            | 1091507             | 25622.2         | 1             | 16   | 2                |
| Langfang    | Hebei          | 15.12      | 6.45  | 39.48  | 1.0098 | 54.00           | 292.00          | 66.28           | 12.54           | 7892526             | 78143.8         | 2             | 70   | 3                |
| Qian'an     | Hebei          | 43.98      | 5.63  | 29.55  | 1.0067 | 26.00           | 128.10          | 42.00           | 6.35            | 8910563             | 111661.2        | 2             | 1600 | 3                |
| Xinji       | Hebei          | 37.02      | 5.25  | 27.76  | 1.0060 | 17.80           | 137.10          | 29.19           | 1.06            | 3861339             | 58505.1         | 0             | 0    | 3                |
| Zhangjiakou | Hebei          | 820.36     | 11.67 | 92.92  | 1.0359 | 89.50           | 376.27          | 86.00           | 9.80            | 5345487             | 54158.9         | 1             | 160  | 3                |
| Bei'an      | Heilongjiang   | 258.40     | 6.83  | 37.89  | 1.0101 | 13.53           | 57.31           | 22.61           | 1.96            | 875392              | 19197.2         | 1             | 6    | 1                |
| Fujin       | Heilongjiang   | 61.38      | 9.00  | 43.52  | 1.0183 | 12.35           | 17.90           | 16.20           | 0.50            | 1533301             | 36077.7         | 3             | 2000 | 2                |
| Heihe       | Heilongjiang   | 129.81     | 8.32  | 43.49  | 1.0179 | 14.54           | 27.88           | 20.00           | 2.91            | 301706              | 13967.9         | 2             | 850  | 3                |
| Jiamusi     | Heilongjiang   | 81.07      | 6.72  | 34.10  | 1.0106 | 60.00           | 96.98           | 96.98           | 3.78            | 4063243             | 52026.2         | 5             | 1500 | 3                |
| Ning'an     | Heilongjiang   | 256.38     | 6.66  | 37.51  | 1.0096 | 7.50            | 13.50           | 11.22           | 0.31            | 1981550             | 44529.2         | 1             | 350  | 0                |
| Jiaozuo     | Henan          | 119.27     | 8.08  | 50.46  | 1.0145 | 77.90           | 140.00          | 111.20          | 8.70            | 4318547             | 43533.7         | 4             | 300  | 3                |
| Luoyang     | Henan          | 161.78     | 6.12  | 40.78  | 1.0084 | 241.20          | 331.42          | 209.37          | 20.77           | 13231407            | 50598.1         | 6             | 800  | 3                |
| Mengzhou    | Henan          | 106.04     | 6.14  | 34.08  | 1.0077 | 15.25           | 113.37          | 15.60           | 2.30            | 2676271             | 68976.1         | 1             | 30   | 2                |
| Xingyang    | Henan          | 144.34     | 6.36  | 37.01  | 1.0085 | 15.62           | 25.35           | 23.45           | 2.24            | 6127512             | 84751.2         | 1             | 100  | 2                |
| Xinzheng    | Henan          | 108.46     | 5.36  | 31.08  | 1.0059 | 24.16           | 34.30           | 31.60           | 3.23            | 8769222             | 82185.8         | 3             | 300  | 2                |
| Dangyang    | Hubei          | 63.69      | 6.34  | 41.46  | 1.0093 | 18.31           | 220.30          | 22.12           | 3.14            | 4350361             | 87886.1         | 5             | 360  | 3                |
| Huanggang   | Hubei          | 25.30      | 6.20  | 41.75  | 1.0091 | 31.31           | 52.22           | 52.22           | 5.81            | 1886894             | 44293.3         | 3             | 2800 | 3                |
| Macheng     | Hubei          | 61.27      | 5.88  | 39.03  | 1.0081 | 23.76           | 251.27          | 35.68           | 5.30            | 2537815             | 21380.1         | 1             | 320  | 2                |
| Qianjiang   | Hubei          | 31.63      | 4.37  | 23.85  | 1.0040 | 41.48           | 311.25          | 50.30           | 4.86            | 5575660             | 54770.7         | 5             | 25   | 3                |
| Xiaogan     | Hubei          | 23.99      | 7.16  | 43.66  | 1.0117 | 50.20           | 90.40           | 50.00           | 0.71            | 2685575             | 29127.7         | 4             | 220  | 3                |
| Chenzhou    | Hunan          | 208.12     | 11.55 | 104.08 | 1.0286 | 62.69           | 580.00          | 77.23           | 13.99           | 5966477             | 66739.1         | 5             | 80   | 3                |
| Hengyang    | Hunan          | 73.04      | 6.22  | 41.76  | 1.0090 | 111.84          | 133.78          | 113.53          | 14.96           | 7525966             | 60644.4         | 5             | 700  | 3                |
| Leiyang     | Hunan          | 95.51      | 7.52  | 54.66  | 1.0130 | 51.70           | 49.65           | 43.00           | 4.03            | 3899472             | 23032.9         | 1             | 260  | 1                |
| Liling      | Hunan          | 83.87      | 8.24  | 71.90  | 1.0166 | 25.07           | 113.50          | 29.50           | 1.19            | 5315568             | 47333.6         | 1             | 270  | 2                |
| Genhe       | Inner Mongolia | 717.63     | 8.99  | 49.37  | 1.0181 | 7.11            | 350.00          | 17.50           | 0.92            | 412394              | 58083.7         | 3             | 80   | 0                |
| Holingol    | Inner Mongolia | 996.35     | 9.42  | 45.36  | 1.0183 | 12.66           | 36.04           | 17.00           | 1.46            | 2802800             | 220692.9        | 1             | 20   | 2                |
| Ordos       | Inner Mongolia | 1307.34    | 6.09  | 40.68  | 1.0079 | 52.33           | 199.42          | 116.42          | 27.59           | 9625700             | 173749.1        | 4             | 700  | 3                |
| Haimen      | Jiangsu        | 8.66       | 3.66  | 20.02  | 1.0030 | 29.40           | 60.00           | 25.43           | 4.09            | 9150197             | 81844.3         | 9             | 60   | 2                |
| Jiangyin    | Jiangsu        | 11.49      | 2.80  | 20.55  | 1.0029 | 36.92           | 198.00          | 125.00          | 14.16           | 28808600            | 175021.9        | 34            | 3000 | 3                |
| Lianyungang | Jiangsu        | 30.17      | 6.56  | 53.85  | 1.0148 | 105.12          | 718.50          | 206.00          | 8.32            | 11853400            | 48302.4         | 7             | 260  | 3                |
| Rugao       | Jiangsu        | 12.07      | 2.81  | 15.07  | 1.0017 | 32.90           | 108.16          | 37.20           | 4.88            | 8124608             | 55307.1         | 18            | 60   | 3                |
| Suzhou      | Jiangsu        | 12.60      | 3.53  | 23.97  | 1.0045 | 299.81          | 1523.88         | 458.29          | 56.10           | 74935800            | 170076.7        | 110           | 110  | 4                |
| Ji'an       | Jiangxi        | 58.85      | 5.76  | 43.39  | 1.0088 | 43.65           | 230.00          | 55.05           | 5.26            | 2099379             | 31664.8         | 3             | 1100 | 3                |
| Leping      | Jiangxi        | 23.51      | 6.00  | 38.55  | 1.0076 | 17.16           | 49.21           | 23.85           | 2.81            | 2650783             | 29355.3         | 2             | 600  | 1                |
| Xinyu       | Jiangxi        | 68.59      | 5.50  | 43.79  | 1.0084 | 46.94           | 230.00          | 76.00           | 6.37            | 7397643             | 80409.2         | 2             | 250  | 3                |
| Zhangshu    | Jiangxi        | 25.22      | 5.33  | 34.59  | 1.0074 | 26.34           | 46.34           | 26.12           | 2.90            | 3092753             | 49405.0         | 3             | 1300 | 2                |
| Hunchun     | Jilin          | 35.23      | 6.36  | 31.27  | 1.0084 | 20.13           | 125.39          | 17.89           | 3.12            | 1423353             | 55383.4         | 3             | 350  | 3                |
| Liaoyuan    | Jilin          | 275.08     | 7.27  | 49.47  | 1.0115 | 48.77           | 46.30           | 46.30           | 1.60            | 4095533             | 83924.9         | 4             | 150  | 2                |
| Shulan      | Jilin          | 241.62     | 7.48  | 48.44  | 1.0123 | 13.30           | 180.00          | 25.00           | 1.50            | 1998684             | 28430.8         | 2             | 40   | 2                |
| Songyuan    | Jilin          | 130.57     | 5.02  | 27.54  | 1.0058 | 49.50           | 81.50           | 50.08           | 10.65           | 5150738             | 81757.7         | 1             | 1800 | 3                |
| Anshan      | Liaoning       | 51.33      | 7.79  | 42.58  | 1.0151 | 158.20          | 624.29          | 170.90          | 8.56            | 10987311            | 59713.6         | 2             | 150  | 3                |
| Linghai     | Liaoning       | 25.67      | 5.98  | 31.80  | 1.0079 | 13.32           | 136.74          | 20.98           | 0.42            | 2542552             | 48063.4         | 1             | 150  | 1                |
| Tieling     | Liaoning       | 60.39      | 5.77  | 33.12  | 1.0074 | 45.10           | 203.65          | 57.00           | 5.25            | 1431155             | 23932.4         | 3             | 210  | 3                |

|             |          |         |       |        |        |        |        |        |       |          |          |    |      |   |
|-------------|----------|---------|-------|--------|--------|--------|--------|--------|-------|----------|----------|----|------|---|
| Zhuanghe    | Liaoning | 16.81   | 4.51  | 33.81  | 1.0081 | 33.98  | 239.00 | 42.20  | 3.52  | 6519470  | 74508.2  | 3  | 300  | 2 |
| Qingtongxia | Ningxia  | 1123.40 | 5.54  | 34.54  | 1.0068 | 13.61  | 32.45  | 32.41  | 3.18  | 1293100  | 42817.9  | 4  | 70   | 3 |
| Zhongwei    | Ningxia  | 1227.23 | 4.17  | 22.44  | 1.0036 | 20.49  | 64.70  | 32.00  | 6.65  | 1462079  | 33922.9  | 2  | 400  | 3 |
| Xining      | Qinghai  | 2344.60 | 14.83 | 129.24 | 1.0565 | 128.75 | 380.00 | 90.00  | 5.40  | 8592329  | 59216.6  | 6  | 120  | 3 |
| Hancheng    | Shaanxi  | 430.17  | 5.75  | 38.13  | 1.0074 | 17.01  | 77.20  | 18.21  | 3.68  | 3112887  | 74293.2  | 1  | 20   | 1 |
| Huayin      | Shaanxi  | 349.97  | 4.18  | 28.96  | 1.0036 | 11.35  | 65.00  | 18.00  | 3.35  | 804221   | 30931.6  | 2  | 40   | 2 |
| Weinan      | Shaanxi  | 372.26  | 7.34  | 54.46  | 1.0127 | 54.00  | 267.00 | 62.70  | 13.32 | 3068115  | 22056.9  | 1  | 100  | 2 |
| Dezhou      | Shandong | 22.85   | 6.27  | 34.91  | 1.0088 | 87.17  | 602.00 | 148.90 | 15.85 | 7775854  | 59222.0  | 7  | 200  | 3 |
| Jining      | Shandong | 37.21   | 6.04  | 35.36  | 1.0082 | 139.88 | 883.87 | 193.84 | 20.85 | 11503100 | 56581.9  | 7  | 250  | 3 |
| Pingdu      | Shandong | 52.10   | 7.55  | 45.65  | 1.0120 | 47.52  | 719.90 | 58.60  | 3.50  | 7792500  | 54077.0  | 4  | 25   | 1 |
| Shouguang   | Shandong | 24.10   | 6.29  | 32.76  | 1.0084 | 34.25  | 328.30 | 39.30  | 6.18  | 8069400  | 66910.4  | 1  | 360  | 4 |
| Tai'an      | Shandong | 193.66  | 9.09  | 76.01  | 1.0278 | 67.30  | 405.82 | 130.65 | 8.47  | 9494100  | 57926.2  | 9  | 140  | 3 |
| Xintai      | Shandong | 210.44  | 6.52  | 44.87  | 1.0109 | 51.67  | 496.47 | 69.41  | 20.00 | 7744800  | 54387.6  | 3  | 50   | 3 |
| Changzhi    | Shanxi   | 933.47  | 6.70  | 38.50  | 1.0099 | 73.92  | 76.20  | 59.30  | 1.25  | 3561913  | 44973.6  | 3  | 55   | 3 |
| Gujiao      | Shanxi   | 1048.55 | 16.11 | 139.80 | 1.0586 | 16.66  | 22.47  | 16.66  | 0.10  | 219944   | 9164.3   | 3  | 130  | 2 |
| Jincheng    | Shanxi   | 731.47  | 7.22  | 51.03  | 1.0109 | 48.00  | 152.00 | 57.00  | -     | 2399429  | 9989.3   | 1  | 40   | 3 |
| Xiaoyi      | Shanxi   | 754.40  | 5.45  | 30.25  | 1.0064 | 30.49  | 54.50  | 26.80  | 1.52  | 3351059  | 69959.5  | 3  | 10   | 3 |
| Chongzhou   | Sichuan  | 532.40  | 6.24  | 31.62  | 1.0079 | 16.00  | 63.42  | 31.07  | 1.13  | 2260951  | 30594.7  | 1  | 400  | 2 |
| Emeishan    | Sichuan  | 438.03  | 6.84  | 42.26  | 1.0098 | 15.56  | 90.20  | 20.60  | 2.27  | 2110344  | 47317.1  | 3  | 60   | 3 |
| Mianyang    | Sichuan  | 482.96  | 8.53  | 65.92  | 1.0166 | 124.30 | 465.00 | 125.00 | 8.60  | 8156824  | 49167.1  | 6  | 1000 | 3 |
| Panzhihua   | Sichuan  | 1206.21 | 18.01 | 212.21 | 1.0725 | 72.00  | 342.56 | 74.08  | 7.78  | 6808503  | 80478.8  | 1  | 250  | 3 |
| Pengzhou    | Sichuan  | 586.57  | 7.26  | 37.86  | 1.0112 | 30.66  | 133.80 | 23.00  | 1.05  | 3335497  | 39567.0  | 1  | 30   | 0 |
| Lhasa       | Tibet    | 3733.21 | 14.02 | 155.11 | 1.0651 | 49.97  | 351.40 | 90.72  | 4.54  | 1969334  | 34671.4  | 4  | 700  | 3 |
| Aksu        | Xinjiang | 1113.60 | 5.11  | 27.23  | 1.0055 | 38.37  | 58.61  | 46.50  | 3.97  | 1727801  | 28140.1  | 1  | 80   | 3 |
| Hami        | Xinjiang | 773.51  | 6.84  | 34.49  | 1.0099 | 20.99  | 71.17  | 41.39  | 2.67  | 3307375  | 77095.0  | 2  | 2    | 3 |
| Kuytun      | Xinjiang | 478.27  | 5.10  | 30.12  | 1.0057 | 16.64  | 24.56  | 24.56  | 5.50  | 1203643  | 64023.6  | 1  | 5    | 3 |
| Baoshan     | Yunnan   | 1686.68 | 8.87  | 71.28  | 1.0200 | 30.80  | 68.00  | 32.00  | 7.33  | 2101937  | 20852.5  | 1  | 30   | 1 |
| Dali        | Yunnan   | 1997.85 | 10.10 | 96.09  | 1.0286 | 30.65  | 87.20  | 40.55  | 2.29  | 3379780  | 48145.0  | 2  | 90   | 3 |
| Jinghong    | Yunnan   | 550.29  | 8.52  | 64.25  | 1.0167 | 18.71  | 83.63  | 27.40  | 11.28 | 1768196  | 30966.7  | 3  | 700  | 3 |
| Yuxi        | Yunnan   | 1662.74 | 9.86  | 73.10  | 1.0216 | 29.93  | 88.12  | 30.17  | 9.52  | 6157729  | 96516.1  | 1  | 50   | 3 |
| Huzhou      | Zhejiang | 12.12   | 3.47  | 26.72  | 1.0046 | 90.20  | 640.69 | 102.90 | 14.49 | 9277807  | 55890.4  | 16 | 300  | 3 |
| Lanxi       | Zhejiang | 36.59   | 5.68  | 43.22  | 1.0094 | 25.98  | 206.30 | 34.90  | 2.40  | 2853557  | 39577.8  | 3  | 900  | 2 |
| Wenling     | Zhejiang | 25.12   | 7.25  | 61.65  | 1.0170 | 28.90  | 121.90 | 34.01  | 2.76  | 8271472  | 63529.0  | 19 | 200  | 3 |
| Zhoushan    | Zhejiang | 30.84   | 8.11  | 73.91  | 1.0235 | 57.82  | 579.99 | 62.15  | 7.82  | 8012264  | 102067.1 | 51 | 120  | 2 |
| Zhuji       | Zhejiang | 20.18   | 5.89  | 42.33  | 1.0114 | 35.47  | 346.62 | 43.90  | 3.96  | 10266139 | 69085.7  | 6  | 130  | 3 |

**Table S1.** Data of the 13 independent variables used in the analyze. Note the climate data is not included, for the unpublishable demands of the data provider.
